# Supplementary material for: Altered neuronal physiology, development, and function associated with a common chromosome 15 duplication involving CHRNA7
Source: PubMed Central journal article supplement (PMC8317352; doi:10.1186/s12915-021-01080-7), 2021-07-28
Supplement: 12915_2021_1080_MOESM14_ESM.pdf [file 12915_2021_1080_MOESM14_ESM.pdf]

**Additional file 14. Examples of genes in selected gene ontology terms described in text**

| Gene Symbols                                                           | Class                                       | Network/Pathways Identified                  | Physiological role                            | References                                                               |
|------------------------------------------------------------------------|---------------------------------------------|----------------------------------------------|-----------------------------------------------|--------------------------------------------------------------------------|
| SLIT2, EPHA8, EPHA5, EPHB4, ROBO3, SLIT3, GJA1 and ROBO2               | Axon guidance molecules                     | Axon guidance signaling                      | Axonal growth                                 | (Jellinger et al., 1988; McFadden and Minschew, 2013; Wang et al., 2018) |
| ITGA1, ITGA2, ITGA3, ITGA5, ITGA9, ITGB3, ITGB4, and ITGB5             | Cell adhesion molecules                     | Integrin Signaling                           | Synaptic development                          | (Carter et al., 2011; Lilja and Ivaska, 2018)                            |
| LMX1A, LMX1B, FOXB1, ARX, PAX6, DLX5, NEUROD1, and LHX1                | Transcription factors                       | Behavior-Cognition, Psychological disorders, | Nervous system development and neuritogenesis | (Thanseem et al., 2011)                                                  |
| KCNJ2, KCNJ5, SCN1A, SCN4B, and HCN1                                   | Channels                                    | Nervous system development and function      | Neuronal development                          | (Guglielmi et al., 2015; Thanseem et al., 2011)                          |
| TBR1, CNTNAP2, DLX2                                                    | Transcription factors and neurexin molecule | Neuritogenesis and migration of neurons      | Neuronal migration                            | (Reiner et al., 2016); Blueprint Genetics                                |
| WNT8B, WNT10B, LEF1, WNT11, FZD2, FZD5, FRZB, FZD8, SFRP2, WNT7A, TCF4 | WNT molecules                               | WNT signaling                                | Neuronal development and neuronal migration   | (Bae and Hong, 2018; Kalkman, 2012; Kwan et al., 2016)                   |
| ARX, COL4A1, COL4A2, EMX2, FLNA, LAMA2, NDE1, OCLN, SRPX2, and WDR62   | Transcription factors and others            | Migration of neurons                         | Neuronal migration                            | Blueprint Genetics                                                       |
